# Supplementary material
Source: MDPI journal article supplement (https://www.mdpi.com/2311-5637/8/8/406)
Supplement: s1 [file s1 › fermentation-1858553-supplementary.pdf]

## Supplementary data

### Figure legends

**Figure S1** The composition of the bacterial community in the rumen fermentation system: at the phylum level (A); at the class level (B); at the order level (C); at the family level (D); at the genus level (E).

**Figure S2** The composition of the archaeal community in the rumen fermentation system: at the phylum level (A); at the class level (B); at the order level (C); at the family level (D); at the genus level (E); at species level (F).

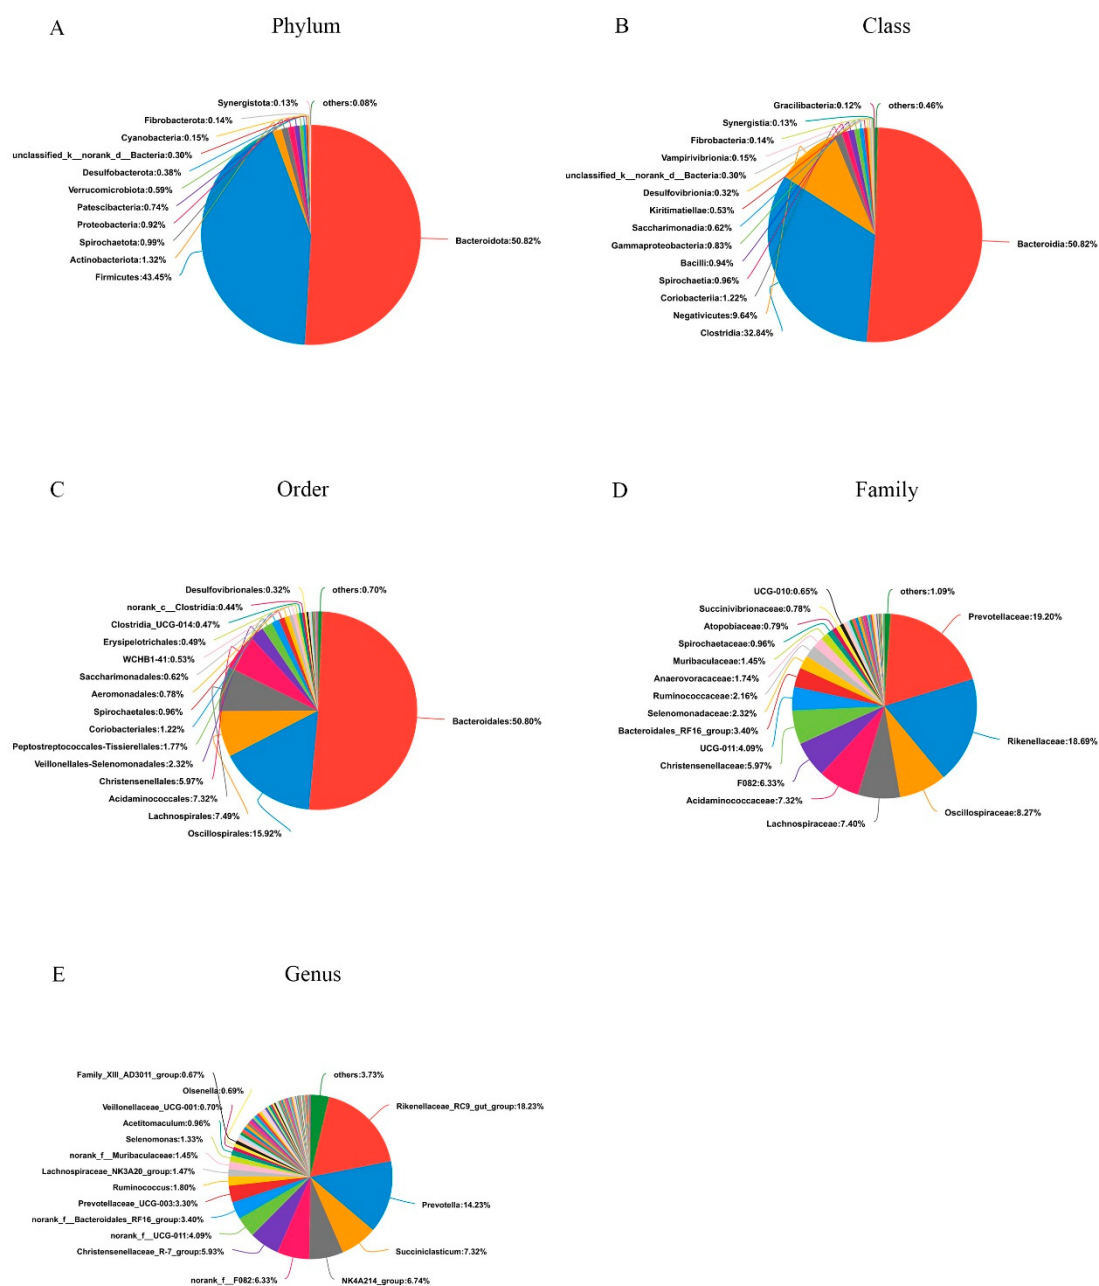

**Figure S1** The composition of the bacterial community in the rumen fermentation system: at the phylum level (A); at the class level (B); at the order level (C); at the family level (D); at the genus level (E).

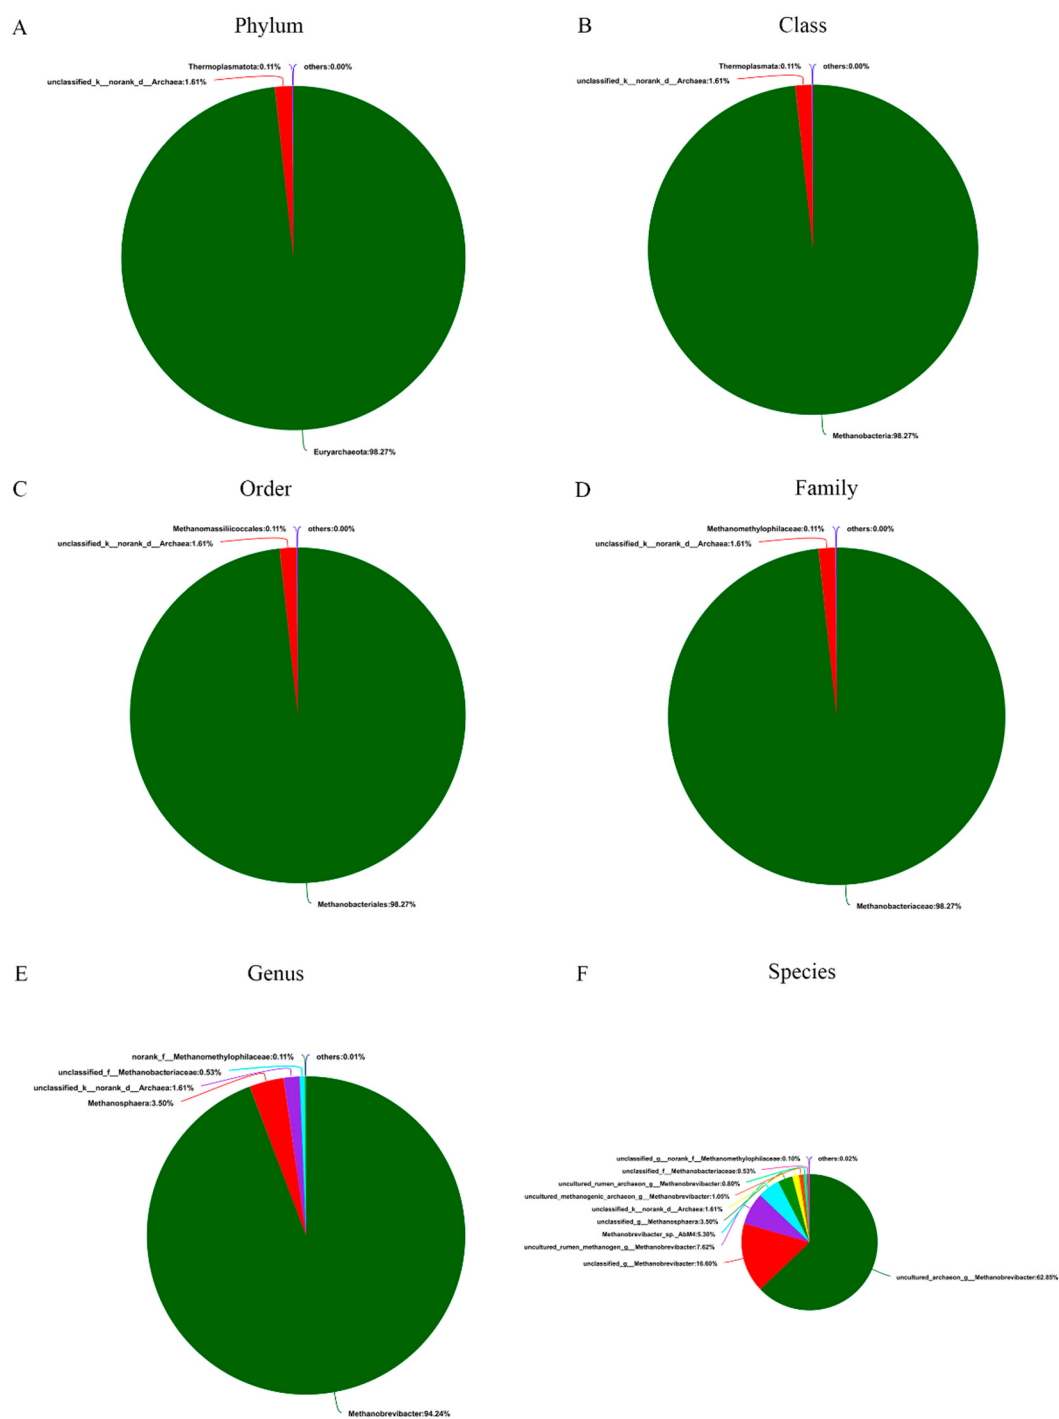

**Figure S2** The composition of the archaeal community in the rumen fermentation system: at the phylum level (A); at the class level (B); at the order level (C); at the family level (D); at the genus level (E); at species level (F).
